# Supplementary material for: Effect of Ethiopian Orthodox fasting practice on appetite hormones and β-cell function of diabetic patients and healthy subjects.
Source: Research Square preprint supplement (doi:10.21203/rs.3.rs-1846637/v1), 2022-07-21
Supplement: Supplementary file 2 [file cb376ed070b98d640a8f7384.xlsx]

## Sheet: Table-1
	Table 1: Socio-demographic information for diabetic patients and healthy people (n=98).
	Variable	DM fasting (n=27)	DM non-fasting (n=25)	Healthy fasting (n=24)	Healthy non-fasting (n=22)
	Gender
	Male	15 (28%)	14 (26%)	14 (30%)	12 (26%)
	Female	12 (23%)	11 (21%)	10 (22%)	10 (22%)
	Age (Mean ±SD)	43	42	29	33
		5	5	4	5
	Married (%)	0.89	0.88	0.33	0.45
	Monthly §income (mean ±SD)	4939	4996	3741.81	3790.73
			1360.59	1579.77	1647.76
	Education level
	Completed high school	2	3	1	2
	Undergraduate level training	20	18	20	18
	Graduate level training	5	4	3	2
	Religion	Orthodox	Orthodox	Orthodox	Orthodox
	Employment
	Government job	22	19	16	18
	Business/Sale	5	6	8	4

## Sheet: Table-2
	Table-2: Within group and mean percentage change of body weight, blood pressure and serum appetite hormones for diabetic patients
	Variable	Fasting group (n=27)				Non fasting (n=25)				Difference (95% CI)	p-value
		Baseline	Last Week	% change		Baseline	Last Week	% change		(Fasting-Non fasting)	for difference
		Mean ±SD	Mean ± SD	Mean ±SE	p-value	Mean ±SD	Mean ±SD	Mean ±SE	p-value
	Weight(Kg)	68.83(9.56)	68.22 ± 9.47	-0.86 ± 0.28	0.004	69.84(5.98)	69.54 ±5.82	-0.39 ± 0.34	0.212	-0.46 [-0.76, -0.16]	0.004
	BMI	26.04(1.95)	25.82 ± 1.87	-0.85 ± 0.28	0.005	25.96(2.36)	25.83 ± 2.48	-0.51 ± 0.45	0.309	-0.18 [-0.32, -0.04]	0.014
	SBP	143.63(11.27)	132.93 ± 6.66	-7.13 ± 1.05	<0.0001	131.92(13.23)	141.80 ±13.48	7.59 ± 0.79	0.08	-2.25 [-5.87, -1.37]	0.218
	DBP	82.81(7.84)	83.77 ±4.29	1.98 ± 2.07	0.494	79.96(10.47)	79.40 ± 11.40	-0.55 ± 1.59	0.678	0.23 [-1.69, 2.69]	0.811
	Glucagon(pg)	266.68(87.44)	146.97 ± 32.65	-41.26 ± 3.35	<0.0001	178.51(71.29)	178.01 ± 54	4.68 ± 4.19	<0.0001	-62.25 [-86.39, -38.11]	< 0.0001
	Ghrelin(pg)	131.58(3.94)	134.51 ± 5.06	2.34 ± 1.02	0.036	130.75(5.48)	130.89± 5.41	0.12 ± 0.11	<0.0001	1.59 [0.16, 3.02]	0.03
	Insulin(pg)	111.09(38.73)	153.06 ± 51.04	56.56 ± 15.15	0.003	121.96(37.28)	129.87± 34.21	16.14 ± 12.42	0.045	25.59 [9.46, 41.73]	0.002
	Leptin(ng)	0.46(0.28)	0.111 ± 0.12	-56.64 ± 13.49	<0.0001	0.49(0.24)	0.53 ± 0.27	35.56 ± 22.25	0.036	-0.16 [-0.26, -0.07]	0.001
	P-value <0.05 is significant, found by independent sample t-test
	SBP: systolic blood pressure DBP in mmHg: diastolic blood pressure in mmHg, pg: pico gram and ng: nano gram
	Mean percentage change was calculated for each parameter and each individual participant as ((value [Last week] – value [baseline])/ value [baseline]) X 100

## Sheet: Table-3
	Table-3: Within group mean percentage change of body weight, blood pressure and Serum Appetite hormones for healthy subjects.
	Variable	Fasting group (n=24)				Non fasting (n=22)				Difference (95% CI)	p-value
		Baseline	Last Week	% increase		Baseline	Last Week	% increase		(Fasting-Non fasting)	for difference
		Mean ±SD	Mean ± SD	Mean ±SE	p-value	Mean ±SD	Mean ±SD	Mean ±SE	p-value
	Weight(Kg)	67.74(8.18)	67.42 ± 8.21	-0.79 ± 0.26	0.064	62.41(10.15)	62.27 ± 10.03	-0.17 ± 0.44	0.126	-0.33 [-0.66, -0.012]	0.041
	BMI	25.07(3.01)	24.85 ± 2.95	-0.83 ± 0.27	0.002	24.49(3.76)	24.42 ± 3.78	-0.29 ± 0.30	0.344	-0.14 [-0.24, -0.04]	0.006
	SBP	115.25(6.67)	116.29 ± 4.48	1.24 ± 1.50	0.767	116.50(5.45)	116.68 ± 4.28	0.26 ± 0.80	0.5	-0.98 [-2.54, 4.49]	0.579
	DBP	72.46(9.01)	74.08 ± 6.98	3.61 ± 3.23	0.691	75.74(5.24)	73.09 ± 7.10	-3.25 ± 2.03	0.910	6.86 [-0.98, 14.70]	0.085
	Glucagon(pg)	216.06(98.89)	151.29 ± 64.79	-20.47 ± 7.99	0.002	178.83(79.76)	161.62 ± 63.89	-1.89 ± 6.23	0.511	-40.99 [-63.39, -18.58]	0.001
	Ghrelin(pg)	132.53(2.82)	133.91 ± 1.63	1.09 ± 0.59	0.075	132.55(3.79)	132.43 ± 3.62	-0.08 ± 0.22	0.126	0.63 [-0.02, 0.18]	0.135
	Insulin(pg)	128.24(30.97)	152.18 ± 32.39	26.56 ± 9.8	0.006	114.81(44.95)	136.64 ± 33.18	42.56 ± 17.02	0.95	-22.88 [-8.19, 37.57]	0.003
	Leptin(ng)	0.48(0.27)	0.52 ± 0.22	72.68 ± 33.38	0.497	0.41(0.25)	0.20 ± 0.17	-32.96 ±18.43	0.462	-0.087 [-0.17, -0.002]	0.046
	P-value <0.05 is significant, found by independent sample t-test
	SBP: systolic blood pressure DBP in mmHg: diastolic blood pressure in mmHg, pg: pico gram and ng: nano gram
	Mean percentage change was calculated for each parameter and each individual participant as ((value [Last week] – value [baseline])/ value [baseline]) X 100

## Sheet: Table-4
	Table 4: Multiple linear regression for association of predictor at baseline and appetite hormones.
	Predictors	Glucagon β[95.0%CI]	Ghrelin β[95.0%CI]	Insulin β[95.0%CI]	Leptin β[95.0%CI]
	R2	0.136	0.183	0.106	0.705
	Age	-0.14[-4.45, 1.65]	-0.04[-0.40, 0.29]	0.07[-2.32, 3.64]	-0.06[-0.02, 0.01]
	Gender	0.27[-1.57, 16.42]	-0.24[-1.82, 0.24]	-0.24[-15.21, 2.33]	0.73[0.09, 0.16]***
	Baseline value FBG	0.03[-0.28, 0.34]	-0.02[-0.04, 0.03]	-0.04[-0.34, 0.26]	-0.07[-0.002, 0.001]
	Baseline value TG	-0.08[-0.25, 0.16]	-0.18[-0.04, 0.012]	0.10[-0.15, 0.25]	0.002[-0.001, 0.001]
	Baseline value TC	-0.19[-1.42, 0.89]	0.35[-0.07, 0.19]	0.13[-0.96, 1.31]	0.19[-0.003, 0.006]
	Baseline value LDL-c	0.07[-0.8, 1.28]	0.04[-0.10, 0.14]	-0.15[-1.50, 0.53]	0.16[0.000, 0.007]
	Baseline value Uric acid	-0.07[-9.79, 6.25]	-0.15[-1.37, 0.46]	-0.08[-9.85, 5.81]	0.36[0.03, 0.09]***
FBS, fasting blood sugar; TG, triglyceride; TC, total cholesterol; LDL-c, low density lipoprotein cholesterol; HDL-c, high density lipoprotein cholesterol; UA, uric acid, β, standardized coefficient, Maximum Variance inflation factor(VIF) of all predictor variable for total cholesterol is 8.25, p-value between 0.05-0.01=*, <0.01-0.001=** and <0.0001=*** and baseline HDL-c and TC/HDL-c are exclude…
